# Supplementary material for: Effects of a laughter program on body weight and mental health among Japanese people with metabolic syndrome risk factors: a randomized controlled trial
Source: PubMed Central journal article supplement (PMC9035242; doi:10.1186/s12877-022-03038-y), 2022-04-23
Supplement: 12877_2022_3038_MOESM1_ESM.pdf [file 12877_2022_3038_MOESM1_ESM.pdf]

**Supplementary Table S1.** Changes and intervention effects in physical and mental health scores except dropouts

| Variables                                | Group    | Examination <sup>a</sup> |                   | Changes     | Changes between laughter and control groups <sup>b</sup> | 95% confidence intervals <sup>c</sup> | Multivariable-adjusted changes | P value <sup>d</sup> |
|------------------------------------------|----------|--------------------------|-------------------|-------------|----------------------------------------------------------|---------------------------------------|--------------------------------|----------------------|
|                                          |          | Baseline                 | 12-week follow-up |             |                                                          |                                       |                                |                      |
| Number                                   | Laughter | 113                      | 113               |             |                                                          |                                       |                                |                      |
|                                          | Control  | 112                      | 112               |             |                                                          |                                       |                                |                      |
| Body mass index, kg/m <sup>2</sup>       | Laughter | 23.1 ± 3.5               | 22.8 ± 3.3        | -0.28 ± 0.5 | -0.19 ± 0.50                                             | -0.32 – -0.06                         | -0.28                          | 0.007                |
|                                          | Control  | 22.8 ± 3.2               | 22.7 ± 3.2        | -0.09 ± 0.5 |                                                          |                                       | -0.10                          |                      |
| Body weight, kg                          | Laughter | 56.4 ± 10.1              | 55.7 ± 9.9        | -0.68 ± 1.2 | -0.44 ± 1.21                                             | -0.76 – -0.12                         | -0.67                          | 0.009                |
|                                          | Control  | 55.8 ± 9.6               | 55.6 ± 9.4        | -0.24 ± 1.2 |                                                          |                                       | -0.25                          |                      |
| Abdominal circumference, cm              | Laughter | 85.2 ± 10.1              | 85.1 ± 9.8        | -0.09 ± 3.3 | -0.01 ± 3.50                                             | -0.93 – 0.91                          | -0.07                          | 0.92                 |
|                                          | Control  | 85.1 ± 10.1              | 85.0 ± 9.7        | -0.08 ± 3.7 |                                                          |                                       | -0.11                          |                      |
| Subjective mental stress, score          | Laughter | 2.3 ± 0.8                | 2.1 ± 0.8         | -0.19 ± 0.6 | -0.25 ± 0.63                                             | -0.41 – -0.08                         | -0.17                          | 0.004                |
|                                          | Control  | 2.2 ± 0.8                | 2.2 ± 0.8         | 0.06 ± 0.6  |                                                          |                                       | 0.05                           |                      |
| Subjective well-being, score             | Laughter | 7.6 ± 1.6                | 8.1 ± 1.3         | 0.42 ± 1.3  | 0.41 ± 1.23                                              | 0.08 – 0.73                           | 0.44                           | 0.002                |
|                                          | Control  | 7.6 ± 1.4                | 7.6 ± 1.5         | 0.01 ± 1.2  |                                                          |                                       | -0.01                          |                      |
| Geriatric depression scale 15, score     | Laughter | 3.7 ± 2.9                | 3.1 ± 2.7         | -0.58 ± 2.0 | -0.29 ± 2.16                                             | -0.87 – 0.28                          | -0.64                          | 0.12                 |
|                                          | Control  | 4.0 ± 3.1                | 3.7 ± 3.1         | -0.28 ± 2.3 |                                                          |                                       | -0.22                          |                      |
| The Revised Life Orientation Test, score | Laughter | 13.5 ± 3.2               | 14.4 ± 3.2        | 0.96 ± 2.6  | 0.58 ± 2.63                                              | -0.11 – 1.27                          | 1.04                           | 0.03                 |
|                                          | Control  | 13.1 ± 3.1               | 13.4 ± 3.3        | 0.38 ± 2.7  |                                                          |                                       | 0.31                           |                      |
| SF-8 Health Survey Scoring               |          |                          |                   |             |                                                          |                                       |                                |                      |
| Physical component summary               | Laughter | 46.7 ± 7.7               | 48.8 ± 6.6        | 2.10 ± 7.8  | 1.94 ± 7.75                                              | -0.10 – 3.98                          | 2.17                           | 0.02                 |
|                                          | Control  | 46.5 ± 7.7               | 46.6 ± 8.4        | 0.11 ± 7.8  |                                                          |                                       | 0.04                           |                      |
| Mental component summary                 | Laughter | 48.9 ± 6.1               | 49.8 ± 6.6        | 0.94 ± 6.8  | 1.16 ± 6.45                                              | -0.53 – 2.85                          | 0.87                           | 0.24                 |
|                                          | Control  | 49.3 ± 6.6               | 49.2 ± 7.2        | -0.11 ± 6.3 |                                                          |                                       | -0.04                          |                      |
| Physical functioning                     | Laughter | 47.6 ± 7.9               | 49.4 ± 6.5        | 1.84 ± 8.0  | 2.31 ± 8.53                                              | 0.07 – 4.55                           | 1.96                           | 0.009                |
|                                          | Control  | 47.3 ± 8.2               | 46.8 ± 9.4        | -0.47 ± 9.1 |                                                          |                                       | -0.59                          |                      |
| Role physical                            | Laughter | 48.3 ± 7.8               | 49.8 ± 5.9        | 1.57 ± 7.2  | 2.26 ± 7.51                                              | 0.29 – 4.23                           | 1.50                           | 0.01                 |
|                                          | Control  | 48.6 ± 6.8               | 47.9 ± 7.7        | -0.69 ± 7.8 |                                                          |                                       | -0.61                          |                      |
| Bodily pain                              | Laughter | 48.4 ± 8.0               | 50.7 ± 8.0        | 2.34 ± 9.3  | 1.71 ± 8.69                                              | -0.57 – 4.00                          | 2.40                           | 0.06                 |
|                                          | Control  | 48.4 ± 8.8               | 49.0 ± 8.7        | 0.63 ± 8.0  |                                                          |                                       | 0.57                           |                      |
| General health perception                | Laughter | 48.5 ± 6.3               | 50.8 ± 5.9        | 2.30 ± 6.0  | 1.27 ± 6.17                                              | -0.35 – 2.89                          | 2.32                           | 0.07                 |
|                                          | Control  | 48.4 ± 7.1               | 49.4 ± 7.4        | 1.03 ± 6.3  |                                                          |                                       | 1.00                           |                      |
| Vitality                                 | Laughter | 49.2 ± 5.9               | 50.7 ± 6.2        | 1.53 ± 6.4  | 1.43 ± 5.91                                              | -0.12 – 2.99                          | 1.47                           | 0.06                 |
|                                          | Control  | 49.6 ± 5.9               | 49.7 ± 6.3        | 0.09 ± 5.3  |                                                          |                                       | 0.15                           |                      |
| Social functioning                       | Laughter | 48.3 ± 8.2               | 49.6 ± 8.1        | 1.24 ± 9.0  | 0.94 ± 8.59                                              | -1.32 – 3.19                          | 1.18                           | 0.39                 |
|                                          | Control  | 48.6 ± 8.7               | 48.9 ± 8.0        | 0.30 ± 8.1  |                                                          |                                       | 0.36                           |                      |
| Role emotional                           | Laughter | 49.3 ± 6.2               | 50.4 ± 5.0        | 1.03 ± 6.6  | 1.61 ± 6.75                                              | -0.16 – 3.39                          | 1.07                           | 0.03                 |
|                                          | Control  | 49.3 ± 6.3               | 48.7 ± 7.8        | -0.58 ± 6.9 |                                                          |                                       | -0.62                          |                      |
| Mental health                            | Laughter | 48.9 ± 6.3               | 50.6 ± 6.3        | 1.66 ± 6.3  | 1.93 ± 6.25                                              | 0.28 – 3.57                           | 1.57                           | 0.03                 |
|                                          | Control  | 49.4 ± 6.7               | 49.3 ± 6.8        | -0.09 ± 6.4 |                                                          |                                       | 0.00                           |                      |

Data are represented as means ± standard deviation and mean change. P values indicate the intervention effects of changes in the intervention and non-intervention periods. Changes in each group are shown as the value of the 12-week follow-up examination minus the value of baseline examination. The intervention effects of the laughter program on variables were analyzed using an analysis of covariance adjusted by age, sex, metabolic syndrome risk factors, medication, and area, and each dependent variable value at baseline. <sup>a</sup> Values are mean ± standard deviation. <sup>b</sup> Baseline and 12-week follow-up changes between the laughter and control groups. <sup>c</sup> 95% confidence intervals between changes in baseline and 12-week follow-up of between the laughter and control groups. <sup>d</sup> P values for comparing the adjusted changes from baseline to 12-week follow-up in the laughter and control groups using an analysis of covariance adjusted by age, sex, medication and area, and each dependent variable value at baseline. SF-8: 8-Item Short Form Health Survey.
